# Supplementary material for: Superchiral hot-spots in “real” chiral plasmonic structures
Source: Royal Society of Chemistry journal article supplement (doi:10.1039/d1ma00831e), 2021-11-02
Supplement: d1ma00831e1.pdf [file d1ma00831e1.pdf]

## Supplementary Information

# Superchiral hot-spots in “real” chiral plasmonic structures.

C. Gilroy<sup>1</sup>, D. Koyroytsaltis-McQuire<sup>1</sup>, N. Gadegaard<sup>2</sup>, A. Karimullah<sup>1</sup> and M. Kadodwala<sup>1\*</sup>

<sup>1</sup> School of Chemistry, University of Glasgow, Glasgow, G12 8QQ, UK

<sup>2</sup> School of Engineering, Rankine Building, University of Glasgow, Glasgow G12 8LT, U.K

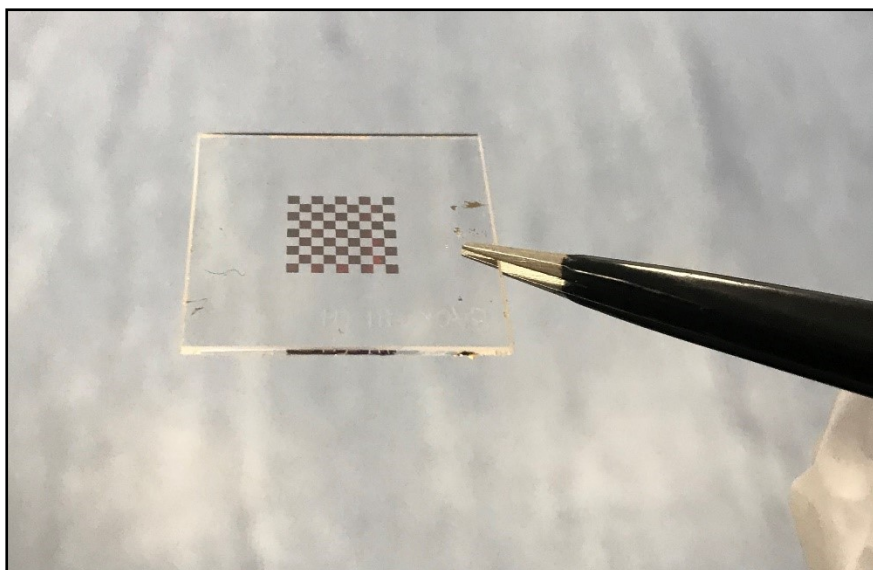

**Figure S1:** The gammadion arrays are arranged in a chessboard formation. Each square in the chessboard has dimension of 1 mm  $\times$  1 mm.

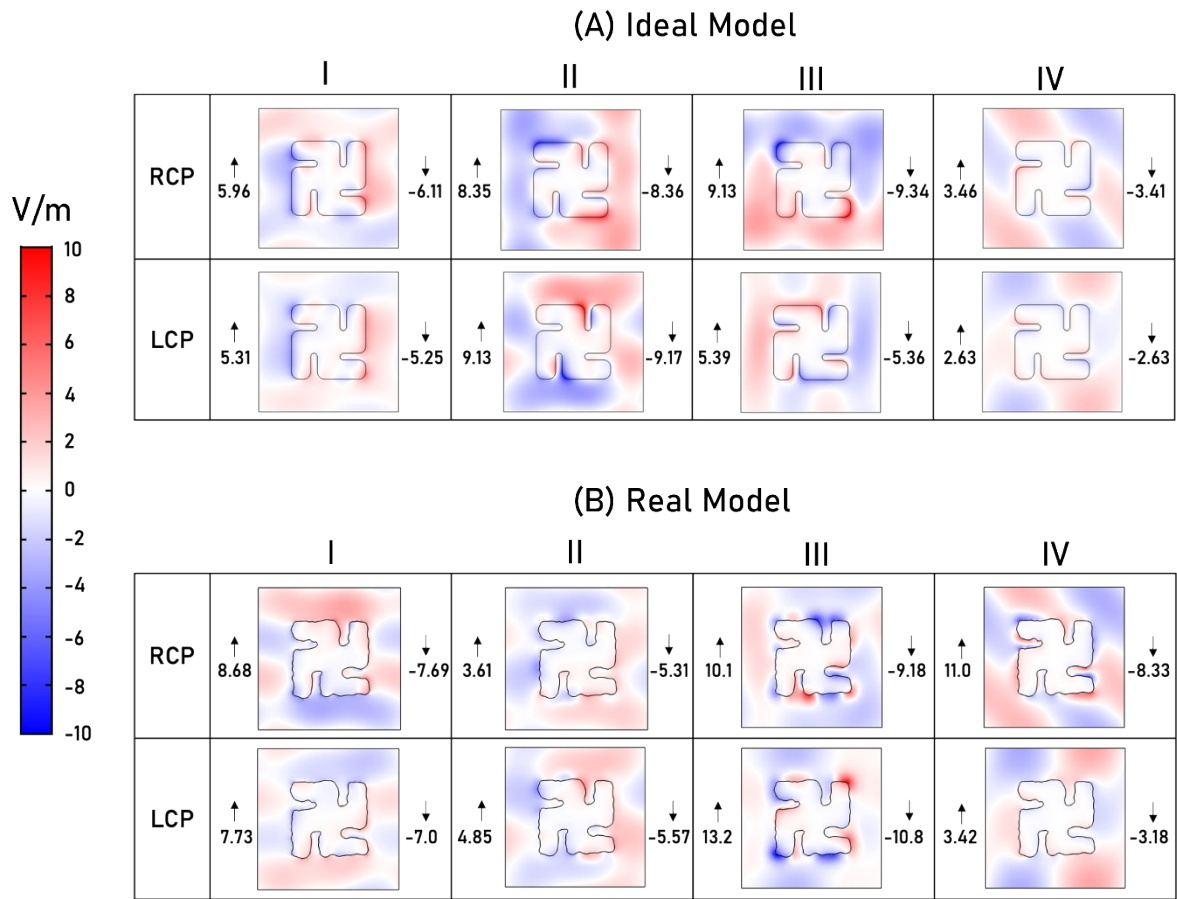

**Figure S2:** z-component of the electric field in a plane 50 nm above the quartz substrate derived (a) ideal and (b) the broad arm structure. The lowest (down arrow) and highest value (up arrow) of  $E_z$  is given in each panel.

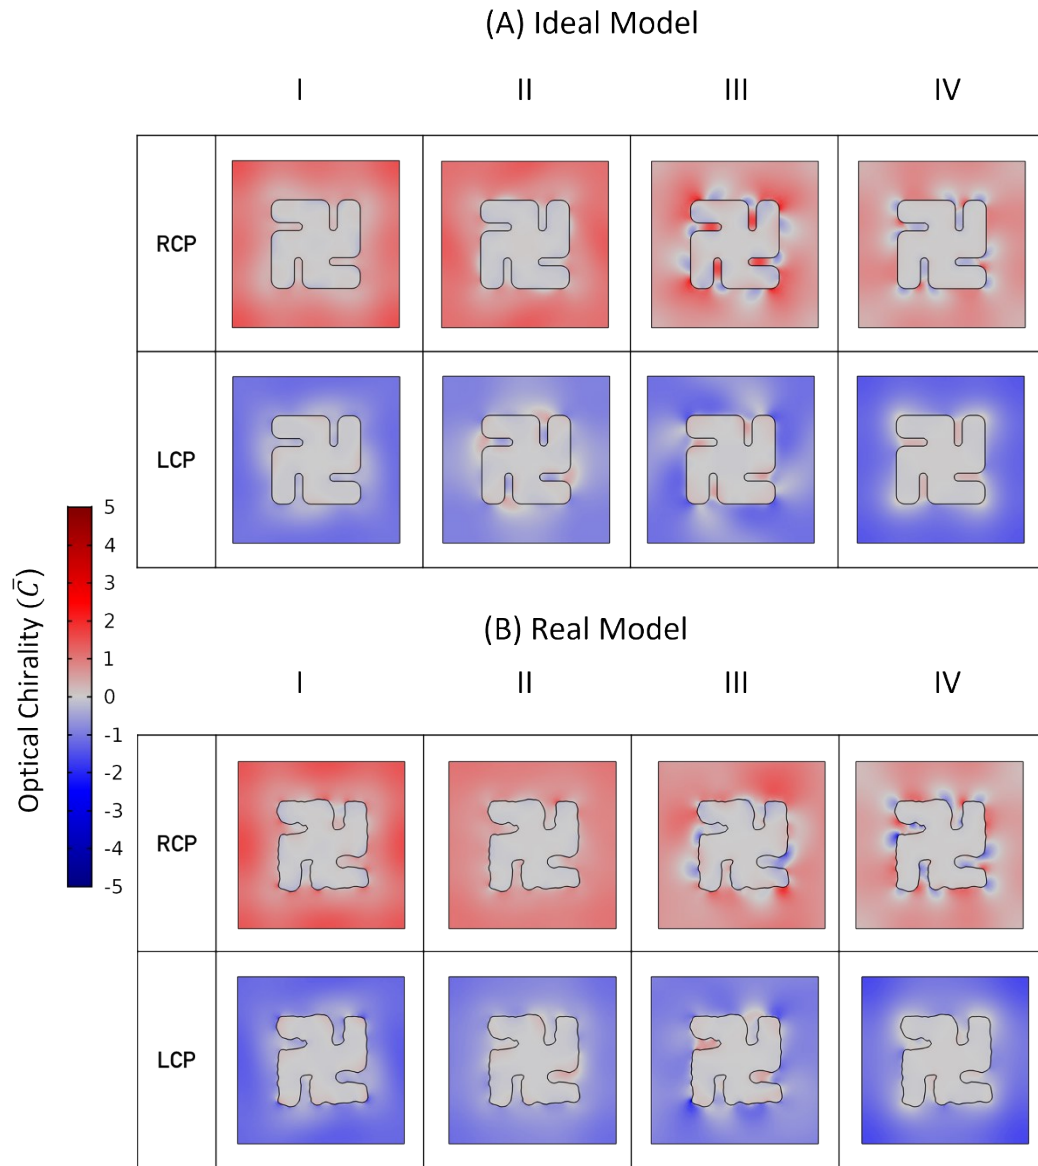

**Figure S3:** Time average optical chirality (normalised against RCP) in a plane 50 nm above the quartz substrate derived (a) ideal and (b) the broad arm structure.
